# Supplementary material
Source: Springer Nature journal article supplement (https://www.springermedizin.de/resource/supplementary/12865_2008_229_MOESM2_ESM.pdf/9427682)

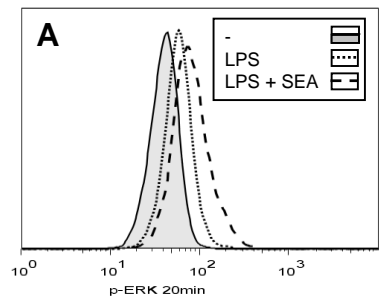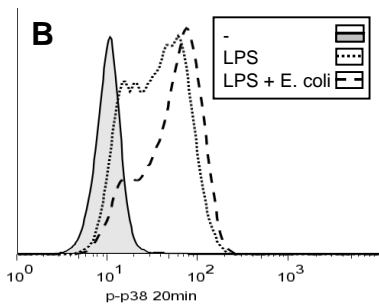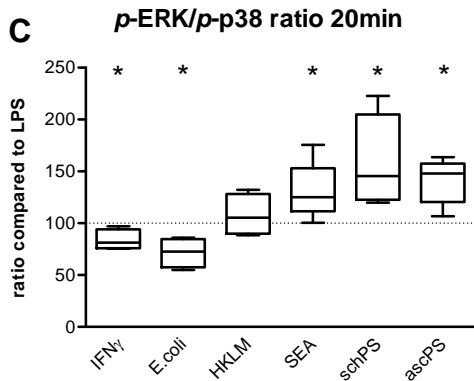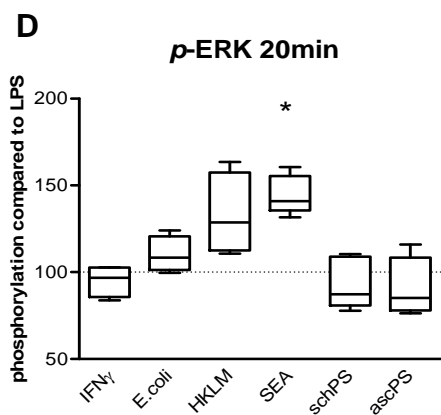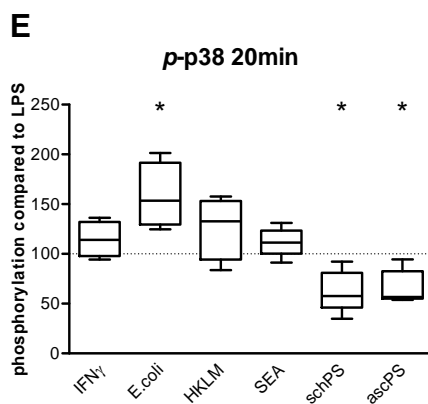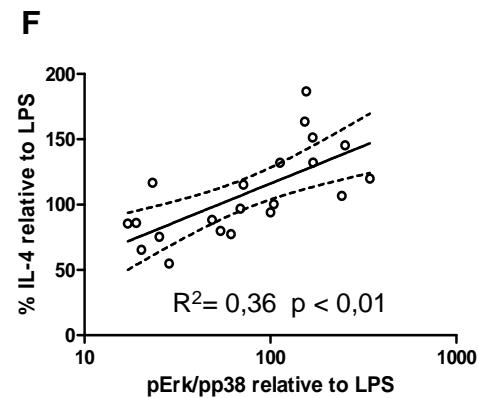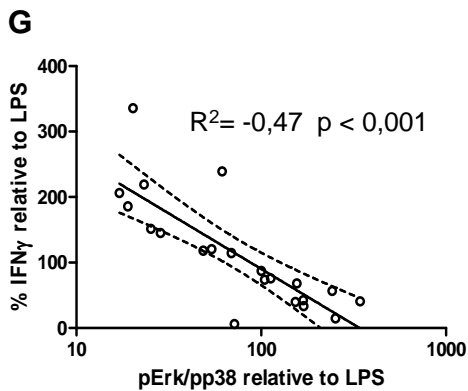

Supplement: MOESM2 [file 9427682]
